# Supplementary material
Source: HighWire-hosted journal article supplement (https://jnm.snmjournals.org/highwire/filestream/104693/field_highwire_adjunct_files/0/262412_Supplemental_Data.pdf)
Supplement: 262412_Supplemental_Data.pdf [file 262412_Supplemental_Data.pdf]

**Supplemental Table 1: Gleason Grade Group Characteristics**

| Gleason Grade Groups<br>(Prostatectomy Specimen)  | All Patients |      | RP  |      | PORT |      |     |      |
|---------------------------------------------------|--------------|------|-----|------|------|------|-----|------|
|                                                   | N            | %    | N   | %    | N    | %    |     |      |
| 1                                                 | 84           | 5.3  | 57  | 3.6  | 27   | 1.7  |     |      |
| 2                                                 | 423          | 26.7 | 275 | 17.3 | 148  | 9.3  |     |      |
| 3                                                 | 425          | 26.8 | 245 | 15.4 | 180  | 11.3 |     |      |
| 4                                                 | 212          | 13.4 | 140 | 8.8  | 72   | 4.5  |     |      |
| 5                                                 | 442          | 27.9 | 282 | 17.8 | 160  | 10.1 |     |      |
| Total                                             | 1586         | 100  | 999 | 63.0 | 587  | 37.0 |     |      |
|                                                   |              |      |     |      |      |      |     |      |
| Gleason Grade Groups<br>(Initial Prostate Biopsy) | All Patients |      | RP  |      | PORT |      | RT  |      |
|                                                   | N            | %    | N   | %    | N    | %    | N   | %    |
| 1                                                 | 124          | 13.0 | 31  | 3.0  | 20   | 2.3  | 73  | 7.7  |
| 2                                                 | 234          | 27.0 | 69  | 6.9  | 55   | 7.4  | 110 | 12.6 |
| 3                                                 | 185          | 20.8 | 73  | 7.4  | 41   | 5.2  | 71  | 8.2  |
| 4                                                 | 161          | 19.0 | 67  | 6.9  | 41   | 5.7  | 53  | 6.3  |
| 5                                                 | 166          | 20.3 | 51  | 5.8  | 33   | 4.5  | 82  | 10.0 |
| Total                                             | 870          | 100  | 291 | 30.1 | 190  | 25.2 | 389 | 44.8 |

**Supplemental Table 2:** <sup>68</sup>Ga-PSMA-11 Detection Rate in Prostate or Prostate Bed Stratified by PSA Level and Prior Therapy.

| PSA range          |   | Total    |          |       | RP       |          |       | PORT     |          |       | RT       |          |       |
|--------------------|---|----------|----------|-------|----------|----------|-------|----------|----------|-------|----------|----------|-------|
|                    |   | Negative | Positive | Total |
| < 0.25 ng/mL       | N | 98       | 18       | 116   | 89       | 16       | 105   | 9        | 2        | 11    |          |          |       |
| % of total N       |   | 4.89     | 0.9      | 5.79  | 8.74     | 1.57     | 10.31 | 1.52     | 0.34     | 1.85  |          |          |       |
| % per column       |   | 6.69     | 3.33     |       | 11.01    | 7.62     |       | 1.75     | 2.53     |       |          |          |       |
| % per row          |   | 84.48    | 15.52    |       | 84.76    | 15.24    |       | 81.82    | 18.18    |       |          |          |       |
| 0.25 - < 0.5 ng/mL | N | 287      | 36       | 323   | 229      | 29       | 258   | 58       | 7        | 65    |          |          |       |
| % of total N       |   | 14.31    | 1.8      | 16.11 | 22.5     | 2.85     | 25.34 | 9.78     | 1.18     | 10.96 |          |          |       |
| % per column       |   | 19.6     | 6.65     |       | 28.34    | 13.81    |       | 11.28    | 8.86     |       |          |          |       |
| % per row          |   | 88.85    | 11.15    |       | 88.76    | 11.24    |       | 89.23    | 10.77    |       |          |          |       |
| 0.5 - < 1.0 ng/mL  | N | 289      | 49       | 338   | 166      | 40       | 206   | 123      | 9        | 132   |          |          |       |
| % of total N       |   | 14.41    | 2.44     | 16.86 | 16.31    | 3.93     | 20.24 | 20.74    | 1.52     | 22.26 |          |          |       |
| % per column       |   | 19.74    | 9.06     |       | 20.54    | 19.05    |       | 23.93    | 11.39    |       |          |          |       |
| % per row          |   | 85.5     | 14.5     |       | 80.58    | 19.42    |       | 93.18    | 6.82     |       |          |          |       |
| 1.0 - < 2.0 ng/mL  | N | 240      | 61       | 301   | 127      | 41       | 168   | 113      | 20       | 133   |          |          |       |
| % of total N       |   | 11.97    | 3.04     | 15.01 | 12.48    | 4.03     | 16.5  | 19.06    | 3.37     | 22.43 |          |          |       |
| % per column       |   | 16.39    | 11.28    |       | 15.72    | 19.52    |       | 21.98    | 25.32    |       |          |          |       |
| % per row          |   | 79.73    | 20.27    |       | 75.6     | 24.4     |       | 84.96    | 15.04    |       |          |          |       |
| 2.0 - < 5.0 ng/mL  | N | 291      | 169      | 460   | 97       | 41       | 138   | 134      | 16       | 150   | 60       | 112      | 172   |
| % of total N       |   | 14.51    | 8.43     | 22.94 | 9.53     | 4.03     | 13.56 | 22.6     | 2.7      | 25.3  | 15.23    | 28.43    | 43.65 |
| % per column       |   | 19.88    | 31.24    |       | 12       | 19.52    |       | 26.07    | 20.25    |       | 42.25    | 44.44    |       |
| % per row          |   | 63.26    | 36.74    |       | 70.29    | 29.71    |       | 89.33    | 10.67    |       | 34.88    | 65.12    |       |
| 5.0 - < 10.0 ng/mL | N | 138      | 118      | 256   | 57       | 27       | 84    | 44       | 14       | 58    | 37       | 77       | 114   |
| % of total N       |   | 6.88     | 5.89     | 12.77 | 5.6      | 2.65     | 8.25  | 7.42     | 2.36     | 9.78  | 9.39     | 19.54    | 28.93 |
| % per column       |   | 9.43     | 21.81    |       | 7.05     | 12.86    |       | 8.56     | 17.72    |       | 26.06    | 30.56    |       |
| % per row          |   | 53.91    | 46.09    |       | 67.86    | 32.14    |       | 75.86    | 24.14    |       | 32.46    | 67.54    |       |
| ≥10 ng/mL          | N | 121      | 90       | 211   | 43       | 16       | 59    | 33       | 11       | 44    | 45       | 63       | 108   |
| % of total N       |   | 6.03     | 4.49     | 10.52 | 4.22     | 1.57     | 5.8   | 5.56     | 1.85     | 7.42  | 11.42    | 15.99    | 27.41 |
| % per column       |   | 8.27     | 16.64    |       | 5.32     | 7.62     |       | 6.42     | 13.92    |       | 31.69    | 25       |       |
| % per row          |   | 57.35    | 42.65    |       | 72.88    | 27.12    |       | 75       | 25       |       | 41.67    | 58.33    |       |
| Total              | N | 1464     | 541      | 2005  | 808      | 210      | 1018  | 514      | 79       | 593   | 142      | 252      | 394   |
| % of total N       |   | 73.02    | 26.98    |       | 79.37    | 20.63    |       | 86.68    | 13.32    |       | 36.04    | 63.96    |       |

**Supplemental Table 3:** <sup>68</sup>Ga-PSMA-11 Detection Rate in Pelvic Lymph Nodes Stratified by PSA Level and Prior Therapy.

| PSA range          |   | Total    |          |       | RP       |          |       | PORT     |          |       | RT       |          |       |
|--------------------|---|----------|----------|-------|----------|----------|-------|----------|----------|-------|----------|----------|-------|
|                    |   | Negative | Positive | Total |
| < 0.25 ng/mL       | N | 86       | 30       | 116   | 78       | 27       | 105   | 8        | 3        | 11    |          |          |       |
| % of total N       |   | 4.29     | 1.5      | 5.79  | 7.66     | 2.65     | 10.31 | 1.35     | 0.51     | 1.85  |          |          |       |
| % per column       |   | 7.71     | 3.37     |       | 13.38    | 6.21     |       | 2.74     | 1        |       |          |          |       |
| % per row          |   | 74.14    | 25.86    |       | 74.29    | 25.71    |       | 72.73    | 27.27    |       |          |          |       |
| 0.25 - < 0.5 ng/mL | N | 219      | 104      | 323   | 180      | 78       | 258   | 39       | 26       | 65    |          |          |       |
| % of total N       |   | 10.92    | 5.19     | 16.11 | 17.68    | 7.66     | 25.34 | 6.58     | 4.38     | 10.96 |          |          |       |
| % per column       |   | 19.62    | 11.7     |       | 30.87    | 17.93    |       | 13.36    | 8.64     |       |          |          |       |
| % per row          |   | 67.8     | 32.2     |       | 69.77    | 30.23    |       | 60       | 40       |       |          |          |       |
| 0.5 - < 1.0 ng/mL  | N | 198      | 140      | 338   | 123      | 83       | 206   | 75       | 57       | 132   |          |          |       |
| % of total N       |   | 9.88     | 6.98     | 16.86 | 12.08    | 8.15     | 20.24 | 12.65    | 9.61     | 22.26 |          |          |       |
| % per column       |   | 17.74    | 15.75    |       | 21.1     | 19.08    |       | 25.68    | 18.94    |       |          |          |       |
| % per row          |   | 58.58    | 41.42    |       | 59.71    | 40.29    |       | 56.82    | 43.18    |       |          |          |       |
| 1.0 - < 2.0 ng/mL  | N | 149      | 152      | 301   | 82       | 86       | 168   | 67       | 66       | 133   |          |          |       |
| % of total N       |   | 7.43     | 7.58     | 15.01 | 8.06     | 8.45     | 16.5  | 11.3     | 11.13    | 22.43 |          |          |       |
| % per column       |   | 13.35    | 17.1     |       | 14.07    | 19.77    |       | 22.95    | 21.93    |       |          |          |       |
| % per row          |   | 49.5     | 50.5     |       | 48.81    | 51.19    |       | 50.38    | 49.62    |       |          |          |       |
| 2.0 - < 5.0 ng/mL  | N | 246      | 214      | 460   | 66       | 72       | 138   | 65       | 85       | 150   | 115      | 57       | 172   |
| % of total N       |   | 12.27    | 10.67    | 22.94 | 6.48     | 7.07     | 13.56 | 10.96    | 14.33    | 25.3  | 29.19    | 14.47    | 43.65 |
| % per column       |   | 22.04    | 24.07    |       | 11.32    | 16.55    |       | 22.26    | 28.24    |       | 47.72    | 37.25    |       |
| % per row          |   | 53.48    | 46.52    |       | 47.83    | 52.17    |       | 43.33    | 56.67    |       | 66.86    | 33.14    |       |
| 5.0 - < 10.0 ng/mL | N | 140      | 116      | 256   | 42       | 42       | 84    | 23       | 35       | 58    | 75       | 39       | 114   |
| % of total N       |   | 6.98     | 5.79     | 12.77 | 4.13     | 4.13     | 8.25  | 3.88     | 5.9      | 9.78  | 19.04    | 9.9      | 28.93 |
| % per column       |   | 12.54    | 13.05    |       | 7.2      | 9.66     |       | 7.88     | 11.63    |       | 31.12    | 25.49    |       |
| % per row          |   | 54.69    | 45.31    |       | 50       | 50       |       | 39.66    | 60.34    |       | 65.79    | 34.21    |       |
| ≥10 ng/mL          | N | 78       | 133      | 211   | 12       | 47       | 59    | 15       | 29       | 44    | 51       | 57       | 108   |
| % of total N       |   | 3.89     | 6.63     | 10.52 | 1.18     | 4.62     | 5.8   | 2.53     | 4.89     | 7.42  | 12.94    | 14.47    | 27.41 |
| % per column       |   | 6.99     | 14.96    |       | 2.06     | 10.8     |       | 5.14     | 9.63     |       | 21.16    | 37.25    |       |
| % per row          |   | 36.97    | 63.03    |       | 20.34    | 79.66    |       | 34.09    | 65.91    |       | 47.22    | 52.78    |       |
| Total              | N | 1116     | 889      | 2005  | 583      | 435      | 1018  | 292      | 301      | 593   | 241      | 153      | 394   |
| % of total N       |   | 55.66    | 44.34    |       | 57.27    | 42.73    |       | 49.24    | 50.76    |       | 61.17    | 38.83    |       |

**Supplemental Table 4:** <sup>68</sup>Ga-PSMA-11 Detection Rate in Soft Tissue Metastases Stratified by PSA Level and Prior Therapy.

| PSA range          |   | Total    |          |       | RP       |          |       | PORT     |          |       | RT       |          |       |
|--------------------|---|----------|----------|-------|----------|----------|-------|----------|----------|-------|----------|----------|-------|
|                    |   | Negative | Positive | Total |
| < 0.25 ng/mL       | N | 107      | 9        | 116   | 98       | 7        | 105   | 9        | 2        | 11    |          |          |       |
| % of total N       |   | 5.34     | 0.45     | 5.79  | 9.63     | 0.69     | 10.31 | 1.52     | 0.34     | 1.85  |          |          |       |
| % per column       |   | 6.93     | 1.95     |       | 11.34    | 4.55     |       | 2.22     | 1.06     |       |          |          |       |
| % per row          |   | 92.24    | 7.76     |       | 93.33    | 6.67     |       | 81.82    | 18.18    |       |          |          |       |
| 0.25 - < 0.5 ng/mL | N | 289      | 34       | 323   | 239      | 19       | 258   | 50       | 15       | 65    |          |          |       |
| % of total N       |   | 14.41    | 1.7      | 16.11 | 23.48    | 1.87     | 25.34 | 8.43     | 2.53     | 10.96 |          |          |       |
| % per column       |   | 18.72    | 7.38     |       | 27.66    | 12.34    |       | 12.35    | 7.98     |       |          |          |       |
| % per row          |   | 89.47    | 10.53    |       | 92.64    | 7.36     |       | 76.92    | 23.08    |       |          |          |       |
| 0.5 - < 1.0 ng/mL  | N | 297      | 41       | 338   | 191      | 15       | 206   | 106      | 26       | 132   |          |          |       |
| % of total N       |   | 14.81    | 2.04     | 16.86 | 18.76    | 1.47     | 20.24 | 17.88    | 4.38     | 22.26 |          |          |       |
| % per column       |   | 19.24    | 8.89     |       | 22.11    | 9.74     |       | 26.17    | 13.83    |       |          |          |       |
| % per row          |   | 87.87    | 12.13    |       | 92.72    | 7.28     |       | 80.3     | 19.7     |       |          |          |       |
| 1.0 - < 2.0 ng/mL  | N | 243      | 58       | 301   | 143      | 25       | 168   | 100      | 33       | 133   |          |          |       |
| % of total N       |   | 12.12    | 2.89     | 15.01 | 14.05    | 2.46     | 16.5  | 16.86    | 5.56     | 22.43 |          |          |       |
| % per column       |   | 15.74    | 12.58    |       | 16.55    | 16.23    |       | 24.69    | 17.55    |       |          |          |       |
| % per row          |   | 80.73    | 19.27    |       | 85.12    | 14.88    |       | 75.19    | 24.81    |       |          |          |       |
| 2.0 - < 5.0 ng/mL  | N | 340      | 120      | 460   | 110      | 28       | 138   | 96       | 54       | 150   | 134      | 38       | 172   |
| % of total N       |   | 16.96    | 5.99     | 22.94 | 10.81    | 2.75     | 13.56 | 16.19    | 9.11     | 25.3  | 34.01    | 9.64     | 43.65 |
| % per column       |   | 22.02    | 26.03    |       | 12.73    | 18.18    |       | 23.7     | 28.72    |       | 48.73    | 31.93    |       |
| % per row          |   | 73.91    | 26.09    |       | 79.71    | 20.29    |       | 64       | 36       |       | 77.91    | 22.09    |       |
| 5.0 - < 10.0 ng/mL | N | 168      | 88       | 256   | 58       | 26       | 84    | 28       | 30       | 58    | 82       | 32       | 114   |
| % of total N       |   | 8.38     | 4.39     | 12.77 | 5.7      | 2.55     | 8.25  | 4.72     | 5.06     | 9.78  | 20.81    | 8.12     | 28.93 |
| % per column       |   | 10.88    | 19.09    |       | 6.71     | 16.88    |       | 6.91     | 15.96    |       | 29.82    | 26.89    |       |
| % per row          |   | 65.63    | 34.38    |       | 69.05    | 30.95    |       | 48.28    | 51.72    |       | 71.93    | 28.07    |       |
| ≥10 ng/mL          | N | 100      | 111      | 211   | 25       | 34       | 59    | 16       | 28       | 44    | 59       | 49       | 108   |
| % of total N       |   | 4.99     | 5.54     | 10.52 | 2.46     | 3.34     | 5.8   | 2.7      | 4.72     | 7.42  | 14.97    | 12.44    | 27.41 |
| % per column       |   | 6.48     | 24.08    |       | 2.89     | 22.08    |       | 3.95     | 14.89    |       | 21.45    | 41.18    |       |
| % per row          |   | 47.39    | 52.61    |       | 42.37    | 57.63    |       | 36.36    | 63.64    |       | 54.63    | 45.37    |       |
| Total              | N | 1544     | 461      | 2005  | 864      | 154      | 1018  | 405      | 188      | 593   | 275      | 119      | 394   |
| % of total N       |   | 77.01    | 22.99    |       | 84.87    | 15.13    |       | 68.3     | 31.7     |       | 69.8     | 30.2     |       |

**Supplemental Table 5:** <sup>68</sup>Ga-PSMA-11 Detection Rate in Bone Metastases Stratified by PSA Level and Prior Therapy.

| PSA range          |   | Total    |          |       | RP       |          |       | PORT     |          |       | RT       |          |       |
|--------------------|---|----------|----------|-------|----------|----------|-------|----------|----------|-------|----------|----------|-------|
|                    |   | Negative | Positive | Total |
| < 0.25 ng/mL       | N | 104      | 12       | 116   | 96       | 9        | 105   | 8        | 3        | 11    |          |          |       |
| % of total N       |   | 5.19     | 0.6      | 5.79  | 9.43     | 0.88     | 10.31 | 1.35     | 0.51     | 1.85  |          |          |       |
| % per column       |   | 6.59     | 2.8      |       | 11.21    | 5.56     |       | 1.86     | 1.85     |       |          |          |       |
| % per row          |   | 89.66    | 10.34    |       | 91.43    | 8.57     |       | 72.73    | 27.27    |       |          |          |       |
| 0.25 - < 0.5 ng/mL | N | 284      | 39       | 323   | 230      | 28       | 258   | 54       | 11       | 65    |          |          |       |
| % of total N       |   | 14.16    | 1.95     | 16.11 | 22.59    | 2.75     | 25.34 | 9.11     | 1.85     | 10.96 |          |          |       |
| % per column       |   | 18.01    | 9.11     |       | 26.87    | 17.28    |       | 12.53    | 6.79     |       |          |          |       |
| % per row          |   | 87.93    | 12.07    |       | 89.15    | 10.85    |       | 83.08    | 16.92    |       |          |          |       |
| 0.5 - < 1.0 ng/mL  | N | 289      | 49       | 338   | 184      | 22       | 206   | 105      | 27       | 132   |          |          |       |
| % of total N       |   | 14.41    | 2.44     | 16.86 | 18.07    | 2.16     | 20.24 | 17.71    | 4.55     | 22.26 |          |          |       |
| % per column       |   | 18.33    | 11.45    |       | 21.5     | 13.58    |       | 24.36    | 16.67    |       |          |          |       |
| % per row          |   | 85.5     | 14.5     |       | 89.32    | 10.68    |       | 79.55    | 20.45    |       |          |          |       |
| 1.0 - < 2.0 ng/mL  | N | 244      | 57       | 301   | 147      | 21       | 168   | 97       | 36       | 133   |          |          |       |
| % of total N       |   | 12.17    | 2.84     | 15.01 | 14.44    | 2.06     | 16.5  | 16.36    | 6.07     | 22.43 |          |          |       |
| % per column       |   | 15.47    | 13.32    |       | 17.17    | 12.96    |       | 22.51    | 22.22    |       |          |          |       |
| % per row          |   | 81.06    | 18.94    |       | 87.5     | 12.5     |       | 72.93    | 27.07    |       |          |          |       |
| 2.0 - < 5.0 ng/mL  | N | 339      | 121      | 460   | 102      | 36       | 138   | 103      | 47       | 150   | 134      | 38       | 172   |
| % of total N       |   | 16.91    | 6.03     | 22.94 | 10.02    | 3.54     | 13.56 | 17.37    | 7.93     | 25.3  | 34.01    | 9.64     | 43.65 |
| % per column       |   | 21.5     | 28.27    |       | 11.92    | 22.22    |       | 23.9     | 29.01    |       | 46.21    | 36.54    |       |
| % per row          |   | 73.7     | 26.3     |       | 73.91    | 26.09    |       | 68.67    | 31.33    |       | 77.91    | 22.09    |       |
| 5.0 - < 10.0 ng/mL | N | 179      | 77       | 256   | 60       | 24       | 84    | 39       | 19       | 58    | 80       | 34       | 114   |
| % of total N       |   | 8.93     | 3.84     | 12.77 | 5.89     | 2.36     | 8.25  | 6.58     | 3.2      | 9.78  | 20.3     | 8.63     | 28.93 |
| % per column       |   | 11.35    | 17.99    |       | 7.01     | 14.81    |       | 9.05     | 11.73    |       | 27.59    | 32.69    |       |
| % per row          |   | 69.92    | 30.08    |       | 71.43    | 28.57    |       | 67.24    | 32.76    |       | 70.18    | 29.82    |       |
| ≥10 ng/mL          | N | 138      | 73       | 211   | 37       | 22       | 59    | 25       | 19       | 44    | 76       | 32       | 108   |
| % of total N       |   | 6.88     | 3.64     | 10.52 | 3.63     | 2.16     | 5.8   | 4.22     | 3.2      | 7.42  | 19.29    | 8.12     | 27.41 |
| % per column       |   | 8.75     | 17.06    |       | 4.32     | 13.58    |       | 5.8      | 11.73    |       | 26.21    | 30.77    |       |
| % per row          |   | 65.4     | 34.6     |       | 62.71    | 37.29    |       | 56.82    | 43.18    |       | 70.37    | 29.63    |       |
| Total              | N | 1577     | 428      | 2005  | 856      | 162      | 1018  | 431      | 162      | 593   | 290      | 104      | 394   |
| % of total N       |   | 78.65    | 21.35    |       | 84.09    | 15.91    |       | 72.68    | 27.32    |       | 73.6     | 26.4     |       |

**Supplemental Table 6** Patient Characteristics of PSMA-positive Scans With or Without Histopathological Evaluation

|                                     | No Histology (PSMA-positive Scan) |                        | Histology (PSMA-positive Scan) |                        |
|-------------------------------------|-----------------------------------|------------------------|--------------------------------|------------------------|
|                                     | N (%)                             | Median (IQR)           | N                              | Median (IQR)           |
| Prostatectomy (RP)                  | 634 (46.7%)                       |                        | 44 (24.6%)                     |                        |
| PORT                                | 429 (31.5%)                       |                        | 56 (31.3%)                     |                        |
| Radiation therapy (RT)              | 297 (21.8%)                       |                        | 79 (44.1%)                     |                        |
| Total                               | 1360 (88.4%)                      |                        | 179 (11.6%)                    |                        |
| Age (years)                         | 1360                              | 70 (IQR 65 - 74)       | 179                            | 70 (IQR 65 - 74)       |
| PSA (ng/mL)                         | 1360                              | 2.2 (0.79 - 5.4)       | 179                            | 3.11 (IQR 1.3 - 6.2)   |
| PSA nadir (ng/mL)                   | 889                               | 0.08 (IQR < 0.1 - 0.4) | 141                            | 0.09 (IQR < 0.1 - 0.4) |
| T-stage (prostatectomy)             | 1343                              | 7 (IQR 5 - 10)         | 157                            | 6 (IQR 4 - 8)          |
| Clinical T-stage                    | 479                               | 3 (IQR 3 - 5)          | 99                             | 3 (IQR 3 - 4)          |
| Gleason grade group (prostatectomy) | 1043                              | 3 (IQR 2 - 5)          | 99                             | 3 (IQR 2 - 5)          |
| Gleason grade group (biopsy)        | 757                               | 3 (IQR 2 - 4)          | 113                            | 2 (IQR 2 - 4)          |
| PSMA inj. Dose (mCi)                | 1826                              | 5.5 (IQR 5 - 6.2)      | 179                            | 5.6 (IQR 5.1 - 6.3)    |
| Locoregional disease present        | 1104 (81.2%)                      |                        | 151 (84.4%)                    |                        |
| Distant disease present             | 688 (50.6%)                       |                        | 70 (39.1%)                     |                        |

T-stage nomenclature: T1 = 1, T1a = 2, T1b = 3, T1c = 4, T2 = 5, T2a = 6, T2b = 7, T2c = 8, T3 = 9, T3a = 10, T3b = 11, T4 = 12

**Supplemental Table 7** Characteristics of Histologically False Positive Lesions.

| Number | Group | Region          | Sampling method | Histology                                                             |
|--------|-------|-----------------|-----------------|-----------------------------------------------------------------------|
| 1      | RPT   | Prostate region | Biopsy          | Urethral anastomosis, negative for malignancy                         |
| 2      | RT    | Prostate region | Biopsy          | Prostate needle biopsy, negative for malignancy with radiation effect |
| 3      | RPT   | Soft tissue     | Surgery         | Right perineal tissue, negative for malignancy                        |
| 4      | RT    | Prostate region | Biopsy          | Prostate needle biopsy, negative for malignancy                       |
| 5      | PORT  | Pelvic nodes    | Surgery         | Salvage pelvic lymph node dissection, negative for malignancy         |
| 6      | RPT   | Prostate region | Biopsy          | Prostate needle biopsy, negative for malignancy                       |
| 7      | RT    | Prostate region | Biopsy          | Prostate needle biopsy, negative for malignancy                       |
| 8      | RPT   | Prostate region | Surgery         | Benign tissue                                                         |
| 9      | RPT   | Pelvic nodes    | Surgery         | Presacral lymph node, negative for malignancy                         |
| 10     | RPT   | Soft tissue     | Biopsy          | Benign inguinal lymph nodes                                           |
| 11     | PORT  | Prostate region | Biopsy          | Periprostatic mass, negative for malignancy                           |
| 12     | RPT   | Pelvic nodes    | Surgery         | External iliac lymph nodes, negative for malignancy                   |
| 13     | RPT   | Pelvic nodes    | Surgery         | Salvage pelvic lymph node dissection, negative for malignancy         |
| 14     | RT    | Prostate region | Biopsy          | Prostate needle biopsy, negative for malignancy                       |
| 15     | RPT   | Pelvic nodes    | Surgery         | Presacral lymph node, negative for malignancy                         |
| 16     | RT    | Prostate region | Biopsy          | Prostate needle biopsy, negative for malignancy                       |
| 17     | RT    | Soft tissue     | Biopsy          | Retroperitoneal nodes, negative for malignancy                        |
| 18     | RT    | Pelvic nodes    | Surgery         | Pelvic mass, negative for malignancy                                  |
| 19     | PORT  | Soft tissue     | Biopsy          | Mediastinal lymph nodes, negative for malignancy                      |
| 20     | RT    | Soft tissue     | Biopsy          | Mediastinal benign granulosa cell tumor                               |

|    |      |                 |         |                                                                       |
|----|------|-----------------|---------|-----------------------------------------------------------------------|
| 21 | RPT  | Soft tissue     | Biopsy  | Benign inguinal lymph nodes                                           |
| 22 | RT   | Prostate region | Biopsy  | Prostate needle biopsy, negative for malignancy                       |
| 23 | RPT  | Soft tissue     | Biopsy  | Benign inguinal lymph nodes                                           |
| 24 | PORT | Soft tissue     | Biopsy  | Benign inguinal lymph nodes                                           |
| 25 | RPT  | Pelvic nodes    | Surgery | Salvage pelvic lymph node dissection, negative for malignancy         |
| 26 | RPT  | Pelvic nodes    | Surgery | Salvage pelvic lymph node dissection, negative for malignancy         |
| 27 | RT   | Prostate region | Biopsy  | Prostate needle biopsy, negative for malignancy                       |
| 28 | PORT | Pelvic nodes    | Surgery | Salvage pelvic lymph node dissection, negative for malignancy         |
| 29 | RT   | Prostate region | Biopsy  | Prostate needle biopsy, negative for malignancy                       |
| 30 | RT   | Prostate region | Biopsy  | Prostate needle biopsy, negative for malignancy with radiation effect |
| 31 | RT   | Prostate region | Biopsy  | Targeted seminal vesicle biopsy, negative for malignancy              |
| 32 | RT   | Prostate region | Biopsy  | Prostate needle biopsy, negative for malignancy                       |
| 33 | PORT | Bone            | Biopsy  | Sacrum negative for malignancy                                        |



**Supplemental Table 8** Overall Disease Burden Listed as Number of Involved Regions by PSA.

| PSA Range          | N              | Total    |            |             |               |              | RP    |          |            |             |               | PORT         |       |          |            |             | RT            |              |       |          |            |             |               |              |       |
|--------------------|----------------|----------|------------|-------------|---------------|--------------|-------|----------|------------|-------------|---------------|--------------|-------|----------|------------|-------------|---------------|--------------|-------|----------|------------|-------------|---------------|--------------|-------|
|                    |                | Negative | One Region | Two Regions | Three Regions | Four Regions | Total | Negative | One Region | Two Regions | Three Regions | Four Regions | Total | Negative | One Region | Two Regions | Three Regions | Four Regions | Total | Negative | One Region | Two Regions | Three Regions | Four Regions | Total |
| < 0.25 ng/mL       | N              | 64       | 37         | 13          | 2             | 0            | 116   | 61       | 31         | 11          | 2             | 0            | 105   | 3        | 6          | 2           | 0             | 0            | 11    |          |            |             |               |              |       |
|                    | % of total N   | 3.2      | 1.9        | 0.7         | 0.1           |              | 5.8   | 6.0      | 3.1        | 1.1         | 0.2           |              | 10.3  | 0.5      | 1.0        | 0.3         |               |              | 1.9   |          |            |             |               |              |       |
|                    | % neg./pos.    | 13.6     | 4.0        | 2.9         | 1.5           |              |       | 18.0     | 6.8        | 6.2         | 6.1           |              |       | 2.7      | 2.1        | 1.3         |               |              |       |          |            |             |               |              |       |
|                    | % in PSA range | 55.2     | 31.9       | 11.2        | 1.7           |              |       | 58.1     | 29.5       | 10.5        | 1.9           |              |       | 27.3     | 54.6       | 18.2        |               |              |       |          |            |             |               |              |       |
| 0.25 - < 0.5 ng/mL | N              | 159      | 122        | 36          | 5             | 1            | 323   | 137      | 93         | 24          | 3             | 1            | 258   | 22       | 29         | 12          | 2             | 0            | 65    |          |            |             |               |              |       |
|                    | % of total N   | 7.9      | 6.1        | 1.8         | 0.3           | 0.1          | 16.1  | 13.5     | 9.1        | 2.4         | 0.3           | 0.1          | 25.3  | 3.7      | 4.9        | 2.0         | 0.3           |              | 11.0  |          |            |             |               |              |       |
|                    | % neg./pos.    | 33.8     | 13.1       | 8.1         | 3.8           | 4.0          |       | 40.4     | 20.4       | 13.6        | 9.1           | 7.7          |       | 20.0     | 10.1       | 8.1         | 4.4           |              |       |          |            |             |               |              |       |
|                    | % in PSA range | 49.2     | 37.8       | 11.2        | 1.6           | 0.3          |       | 53.1     | 36.1       | 9.3         | 1.2           | 0.4          |       | 33.9     | 44.6       | 18.5        | 3.1           |              |       |          |            |             |               |              |       |
| 0.5 - < 1.0 ng/mL  | N              | 104      | 192        | 40          | 1             | 1            | 338   | 70       | 114        | 21          | 0             | 1            | 206   | 34       | 78         | 19          | 1             | 0            | 132   |          |            |             |               |              |       |
|                    | % of total N   | 5.2      | 9.6        | 2.0         | 0.1           | 0.1          | 16.9  | 6.9      | 11.2       | 2.1         |               | 0.1          | 20.2  | 5.7      | 13.2       | 3.2         | 0.2           |              | 22.3  |          |            |             |               |              |       |
|                    | % neg./pos.    | 22.1     | 20.6       | 9.0         | 0.8           | 4.0          |       | 20.7     | 25.0       | 11.9        |               | 7.7          |       | 30.9     | 27.3       | 12.8        | 2.2           |              |       |          |            |             |               |              |       |
|                    | % in PSA range | 30.8     | 56.8       | 11.8        | 0.3           | 0.3          |       | 34.0     | 55.3       | 10.2        |               | 0.5          |       | 25.8     | 59.1       | 14.4        | 0.8           |              |       |          |            |             |               |              |       |
| 1.0 - < 2.0 ng/mL  | N              | 66       | 160        | 60          | 12            | 3            | 301   | 40       | 92         | 29          | 5             | 2            | 168   | 26       | 68         | 31          | 7             | 1            | 133   |          |            |             |               |              |       |
|                    | % of total N   | 3.3      | 8.0        | 3.0         | 0.6           | 0.2          | 15.0  | 3.9      | 9.0        | 2.9         | 0.5           | 0.2          | 16.5  | 4.4      | 11.5       | 5.2         | 1.2           | 0.2          | 22.4  |          |            |             |               |              |       |
|                    | % neg./pos.    | 14.0     | 17.2       | 13.5        | 9.1           | 12.0         |       | 11.8     | 20.2       | 16.4        | 15.2          | 15.4         |       | 23.6     | 23.8       | 20.8        | 15.2          | 50.0         |       |          |            |             |               |              |       |
|                    | % in PSA range | 21.9     | 53.2       | 19.9        | 4.0           | 1.0          |       | 23.8     | 54.8       | 17.3        | 3.0           | 1.2          |       | 19.6     | 51.1       | 23.3        | 5.3           | 0.8          |       |          |            |             |               |              |       |
| 2.0 - < 5.0 ng/mL  | N              | 49       | 244        | 125         | 38            | 4            | 460   | 19       | 75         | 32          | 10            | 2            | 138   | 19       | 76         | 40          | 14            | 1            | 150   | 11       | 93         | 53          | 14            | 1            | 172   |
|                    | % of total N   | 2.4      | 12.2       | 6.2         | 1.9           | 0.2          | 22.9  | 1.9      | 7.4        | 3.1         | 1.0           | 0.2          | 13.6  | 3.2      | 12.8       | 6.8         | 2.4           | 0.2          | 25.3  | 2.8      | 23.6       | 13.5        | 3.6           | 0.3          | 43.7  |
|                    | % neg./pos.    | 10.4     | 26.2       | 28.0        | 28.8          | 16.0         |       | 5.6      | 16.5       | 18.1        | 30.3          | 15.4         |       | 17.3     | 26.6       | 26.9        | 30.4          | 50.0         |       | 50.0     | 49.2       | 44.2        | 26.4          | 10.0         |       |
|                    | % in PSA range | 10.7     | 53.0       | 27.2        | 8.3           | 0.9          |       | 13.8     | 54.4       | 23.2        | 7.3           | 1.5          |       | 12.7     | 50.7       | 26.7        | 9.3           | 0.7          |       | 6.4      | 54.1       | 30.8        | 8.1           | 0.6          |       |
| 5.0 - < 10.0 ng/mL | N              | 20       | 114        | 87          | 29            | 6            | 256   | 10       | 37         | 31          | 4             | 2            | 84    | 5        | 17         | 27          | 9             | 0            | 58    | 5        | 60         | 29          | 16            | 4            | 114   |
|                    | % of total N   | 1.0      | 5.7        | 4.3         | 1.5           | 0.3          | 12.8  | 1.0      | 3.6        | 3.1         | 0.4           | 0.2          | 8.3   | 0.8      | 2.9        | 4.6         | 1.5           |              | 9.8   | 1.3      | 15.2       | 7.4         | 4.1           | 1.0          | 28.9  |
|                    | % neg./pos.    | 4.3      | 12.2       | 19.5        | 22.0          | 24.0         |       | 3.0      | 8.1        | 17.5        | 12.1          | 15.4         |       | 4.6      | 5.9        | 18.1        | 19.6          |              |       | 22.7     | 31.8       | 24.2        | 30.2          | 40.0         |       |
|                    | % in PSA range | 7.8      | 44.5       | 34.0        | 11.3          | 2.3          |       | 11.9     | 44.1       | 36.9        | 4.8           | 2.4          |       | 8.6      | 29.3       | 46.6        | 15.5          |              |       | 4.4      | 52.6       | 25.4        | 14.0          | 3.5          |       |
| ≥10 ng/mL          | N              | 9        | 62         | 85          | 45            | 10           | 211   | 2        | 14         | 29          | 9             | 5            | 59    | 1        | 12         | 18          | 13            | 0            | 44    | 6        | 36         | 38          | 23            | 5            | 108   |
|                    | % of total N   | 0.5      | 3.1        | 4.2         | 2.2           | 0.5          | 10.5  | 0.2      | 1.4        | 2.9         | 0.9           | 0.5          | 5.8   | 0.2      | 2.0        | 3.0         | 2.2           |              | 7.4   | 1.5      | 9.1        | 9.6         | 5.8           | 1.3          | 27.4  |
|                    | % neg./pos.    | 1.9      | 6.7        | 19.1        | 34.1          | 40.0         |       | 0.6      | 3.1        | 16.4        | 27.3          | 38.5         |       | 0.9      | 4.2        | 12.1        | 28.3          |              |       | 27.3     | 19.1       | 31.7        | 43.4          | 50.0         |       |
|                    | % in PSA range | 4.3      | 29.4       | 40.3        | 21.3          | 4.7          |       | 3.4      | 23.7       | 49.2        | 15.3          | 8.5          |       | 2.3      | 27.3       | 40.9        | 29.6          |              |       | 5.6      | 33.3       | 35.2        | 21.3          | 4.6          |       |
| Total              | N              | 471      | 931        | 446         | 132           | 25           | 2005  | 339      | 456        | 177         | 33            | 13           | 1018  | 110      | 286        | 149         | 46            | 2            | 593   | 22       | 189        | 120         | 53            | 10           | 394   |
|                    | % of total N   | 23.5     | 46.4       | 22.2        | 6.6           | 1.3          |       | 33.3     | 44.8       | 17.4        | 3.2           | 1.3          |       | 18.6     | 48.2       | 25.1        | 7.8           | 0.3          |       | 5.6      | 48.0       | 30.5        | 13.5          | 2.5          |       |

Regions may represent either prostate/bed, pelvic lymph nodes, soft tissue metastases and/or bone metastases.

**Supplemental Table 9** Locoregional Disease Burden (Prostate/Prostate Bed and/or Pelvic Lymph Nodes) by PSA.

| PSA range          | Total    |          |       | RP       |          |       | PORT     |          |       | RT       |          |       |      |
|--------------------|----------|----------|-------|----------|----------|-------|----------|----------|-------|----------|----------|-------|------|
|                    | Negative | Positive | Total |      |
| < 0.25 ng/mL       | N        | 73       | 43    | 116      | 67       | 38    | 105      | 6        | 5     | 11       |          |       |      |
| % of total N       |          | 3.6      | 2.1   | 5.8      | 6.6      | 3.7   | 10.3     | 1.0      | 0.8   | 1.9      |          |       |      |
| % per column       |          | 9.8      | 3.4   |          | 15.5     | 6.5   |          | 2.5      | 1.4   |          |          |       |      |
| % per row          |          | 62.9     | 37.1  |          | 63.8     | 36.2  |          | 54.6     | 45.5  |          |          |       |      |
| 0.25 - < 0.5 ng/mL | N        | 191      | 132   | 323      | 158      | 100   | 258      | 33       | 32    | 65       |          |       |      |
| % of total N       |          | 9.5      | 6.6   | 16.1     | 15.5     | 9.8   | 25.3     | 5.6      | 5.4   | 11.0     |          |       |      |
| % per column       |          | 25.6     | 10.5  |          | 36.6     | 17.1  |          | 13.8     | 9.1   |          |          |       |      |
| % per row          |          | 59.1     | 40.9  |          | 61.2     | 38.8  |          | 50.8     | 49.2  |          |          |       |      |
| 0.5 - < 1.0 ng/mL  | N        | 154      | 184   | 338      | 87       | 119   | 206      | 67       | 65    | 132      |          |       |      |
| % of total N       |          | 7.7      | 9.2   | 16.9     | 8.6      | 11.7  | 20.2     | 11.3     | 11.0  | 22.3     |          |       |      |
| % per column       |          | 20.6     | 14.6  |          | 20.1     | 20.3  |          | 27.9     | 18.4  |          |          |       |      |
| % per row          |          | 45.6     | 54.4  |          | 42.2     | 57.8  |          | 50.8     | 49.2  |          |          |       |      |
| 1.0 - < 2.0 ng/mL  | N        | 107      | 194   | 301      | 52       | 116   | 168      | 55       | 78    | 133      |          |       |      |
| % of total N       |          | 5.3      | 9.7   | 15.0     | 5.1      | 11.4  | 16.5     | 9.3      | 13.2  | 22.4     |          |       |      |
| % per column       |          | 14.3     | 15.4  |          | 12.0     | 19.8  |          | 22.9     | 22.1  |          |          |       |      |
| % per row          |          | 35.6     | 64.5  |          | 31.0     | 69.1  |          | 41.4     | 58.7  |          |          |       |      |
| 2.0 - < 5.0 ng/mL  | N        | 127      | 333   | 460      | 38       | 100   | 138      | 52       | 98    | 150      | 37       | 135   | 172  |
| % of total N       |          | 6.3      | 16.6  | 22.9     | 3.7      | 9.8   | 13.6     | 8.8      | 16.5  | 25.3     | 9.4      | 34.3  | 43.7 |
| % per column       |          | 17.0     | 26.5  |          | 8.8      | 17.1  |          | 21.7     | 27.8  |          | 50.0     | 42.2  |      |
| % per row          |          | 27.6     | 72.4  |          | 27.5     | 72.5  |          | 34.7     | 65.3  |          | 21.5     | 78.5  |      |
| 5.0 - < 10.0 ng/mL | N        | 59       | 197   | 256      | 23       | 61    | 84       | 15       | 43    | 58       | 21       | 93    | 114  |
| % of total N       |          | 2.9      | 9.8   | 12.8     | 2.3      | 6.0   | 8.3      | 2.5      | 7.3   | 9.8      | 5.3      | 23.6  | 28.9 |
| % per column       |          | 7.9      | 15.7  |          | 5.3      | 10.4  |          | 6.3      | 12.2  |          | 28.4     | 29.1  |      |
| % per row          |          | 23.1     | 77.0  |          | 27.4     | 72.6  |          | 25.9     | 74.1  |          | 18.4     | 81.6  |      |
| ≥10 ng/mL          | N        | 35       | 176   | 211      | 7        | 52    | 59       | 12       | 32    | 44       | 16       | 92    | 108  |
| % of total N       |          | 1.8      | 8.8   | 10.5     | 0.7      | 5.1   | 5.8      | 2.0      | 5.4   | 7.4      | 4.1      | 23.4  | 27.4 |
| % per column       |          | 4.7      | 14.0  |          | 1.6      | 8.9   |          | 5.0      | 9.1   |          | 21.6     | 28.8  |      |
| % per row          |          | 16.6     | 83.4  |          | 11.9     | 88.1  |          | 27.3     | 72.7  |          | 14.8     | 85.2  |      |
| Total              | N        | 746      | 1259  | 2005     | 432      | 586   | 1018     | 240      | 353   | 593      | 74       | 320   | 394  |
| % of total N       |          | 37.2     | 62.8  |          | 42.4     | 57.6  |          | 40.5     | 59.5  |          | 18.8     | 81.2  |      |

**Supplemental Table 10** Distant Disease Burden (Soft Tissue and/or Bone Metastases) by PSA.

| PSA range          |   | Total    |          |       | RP       |          |       | PORT     |          |       | RT       |          |       |
|--------------------|---|----------|----------|-------|----------|----------|-------|----------|----------|-------|----------|----------|-------|
|                    |   | Negative | Positive | Total |
| < 0.25 ng/mL       | N | 100      | 16       | 116   | 93       | 12       | 105   | 7        | 4        | 11    |          |          |       |
| % of total N       |   | 5.0      | 0.8      | 5.8   | 9.1      | 1.2      | 10.3  | 1.2      | 0.7      | 1.9   |          |          |       |
| % per column       |   | 8.0      | 2.1      |       | 12.5     | 4.4      |       | 2.3      | 1.4      |       |          |          |       |
| % per row          |   | 86.2     | 13.8     |       | 88.6     | 11.4     |       | 63.6     | 36.4     |       |          |          |       |
| 0.25 - < 0.5 ng/mL | N | 256      | 67       | 323   | 214      | 44       | 258   | 42       | 23       | 65    |          |          |       |
| % of total N       |   | 12.8     | 3.3      | 16.1  | 21.0     | 4.3      | 25.3  | 7.1      | 3.9      | 11.0  |          |          |       |
| % per column       |   | 20.6     | 8.8      |       | 28.8     | 16.0     |       | 14.1     | 7.8      |       |          |          |       |
| % per row          |   | 79.3     | 20.7     |       | 83.0     | 17.1     |       | 64.6     | 35.4     |       |          |          |       |
| 0.5 - < 1.0 ng/mL  | N | 252      | 86       | 338   | 170      | 36       | 206   | 82       | 50       | 132   |          |          |       |
| % of total N       |   | 12.6     | 4.3      | 16.9  | 16.7     | 3.5      | 20.2  | 13.8     | 8.4      | 22.3  |          |          |       |
| % per column       |   | 20.2     | 11.3     |       | 22.9     | 13.1     |       | 27.4     | 17.0     |       |          |          |       |
| % per row          |   | 74.6     | 25.4     |       | 82.5     | 17.5     |       | 62.1     | 37.9     |       |          |          |       |
| 1.0 - < 2.0 ng/mL  | N | 201      | 100      | 301   | 127      | 41       | 168   | 74       | 59       | 133   |          |          |       |
| % of total N       |   | 10.0     | 5.0      | 15.0  | 12.5     | 4.0      | 16.5  | 12.5     | 10.0     | 22.4  |          |          |       |
| % per column       |   | 16.1     | 13.2     |       | 17.1     | 14.9     |       | 24.8     | 20.1     |       |          |          |       |
| % per row          |   | 66.8     | 33.2     |       | 75.6     | 24.4     |       | 55.6     | 44.4     |       |          |          |       |
| 2.0 - < 5.0 ng/mL  | N | 255      | 205      | 460   | 82       | 56       | 138   | 68       | 82       | 150   | 105      | 67       | 172   |
| % of total N       |   | 12.7     | 10.2     | 22.9  | 8.1      | 5.5      | 13.6  | 11.5     | 13.8     | 25.3  | 26.7     | 17.0     | 43.7  |
| % per column       |   | 20.5     | 27.0     |       | 11.0     | 20.4     |       | 22.7     | 27.9     |       | 51.5     | 35.3     |       |
| % per row          |   | 55.4     | 44.6     |       | 59.4     | 40.6     |       | 45.3     | 54.7     |       | 61.1     | 39.0     |       |
| 5.0 - < 10.0 ng/mL | N | 118      | 138      | 256   | 43       | 41       | 84    | 18       | 40       | 58    | 57       | 57       | 114   |
| % of total N       |   | 5.9      | 6.9      | 12.8  | 4.2      | 4.0      | 8.3   | 3.0      | 6.8      | 9.8   | 14.5     | 14.5     | 28.9  |
| % per column       |   | 9.5      | 18.2     |       | 5.8      | 14.9     |       | 6.0      | 13.6     |       | 27.9     | 30.0     |       |
| % per row          |   | 46.1     | 53.9     |       | 51.2     | 48.8     |       | 31.0     | 69.0     |       | 50.0     | 50.0     |       |
| ≥10 ng/mL          | N | 64       | 147      | 211   | 14       | 45       | 59    | 8        | 36       | 44    | 42       | 66       | 108   |
| % of total N       |   | 3.2      | 7.3      | 10.5  | 1.4      | 4.4      | 5.8   | 1.4      | 6.1      | 7.4   | 10.7     | 16.8     | 27.4  |
| % per column       |   | 5.1      | 19.4     |       | 1.9      | 16.4     |       | 2.7      | 12.2     |       | 20.6     | 34.7     |       |
| % per row          |   | 30.3     | 69.7     |       | 23.7     | 76.3     |       | 18.2     | 81.8     |       | 38.9     | 61.1     |       |
| Total              | N | 1246     | 759      | 2005  | 743      | 275      | 1018  | 299      | 294      | 593   | 204      | 190      | 394   |
| % of total N       |   | 62.1     | 37.9     |       | 73.0     | 27.0     |       | 50.4     | 49.6     |       | 51.8     | 48.2     |       |
